# Supplementary material
Source: PubMed Central journal article supplement (PMC6261686)
Supplement: NIHMS1508060-supplement-2.pdf [file NIHMS1508060-supplement-2.pdf]

### Supplementary Table Column labels

meanWT = mean normalized gene expression level in wild-type cells

meanWTHET = mean normalized gene expression level in wild-type cells from mosaic female

Mecp2<sup>+/-</sup> mice

meanKO = mean normalized gene expression level in Mecp2 knockout cells

meanMT = mean normalized gene expression level in MECP2 mutant cells

Log2FC = Log2 fold change between the two conditions in the table

pval = P value associated with the difference in gene expression between the two conditions in the table

qval = the q-value associated with the difference in gene expression between the two conditions in the table. The q-value is an adjusted p-value for the false discovery rate.

Differential expression analysis was performed with Monocle2
